# Supplementary material
Source: PubMed Central journal article supplement (PMC2922690)
Supplement: NIHMS214547-supplement-1_si_001.pdf [file NIHMS214547-supplement-1_si_001.pdf]

**Supporting Information for**

**“LC-MS/MS Coupled with Stable Isotope Dilution Method for  
the Quantification of 6-Thioguanine and S<sup>6</sup>-Methylthioguanine  
in Genomic DNA of Human Cancer Cells Treated with 6-  
Thioguanine”**

by

Hongxia Wang and Yinsheng Wang

Department of Chemistry, University of California, Riverside, California 92521-0403

*Anal. Chem.*, 2010

**Figure S1.** Positive ESI-MS of [U-<sup>15</sup>N<sub>5</sub>]-<sup>S</sup>dG (a), and the MS/MS of the [M+H]<sup>+</sup> ion of *m/z* 289.0 (b), and shown in (c) is the MS/MS/MS of the ion of *m/z* 173.1 found in (b).

**Figure S2.** Positive ESI-MS of D<sub>3</sub>-<sup>S</sup>mdG (a), and the MS/MS of the [M+H]<sup>+</sup> ion of *m/z* 301.0 (b).

**Figure S3.** Calibration curves for the quantification of <sup>S</sup>dG (a) and <sup>S</sup>mdG (b). The amounts of [U-<sup>15</sup>N<sub>5</sub>]-<sup>S</sup>dG (a) and D<sub>3</sub>-<sup>S</sup>mdG (b) added were 100 fmol. Error bars represent standard deviations resulting from three independent measurements.

**Figure S4.** Positive-ion ESI-MS/MS (a) and MS/MS/MS (b) spectra of 8-oxo-2'-deoxyguanosine.

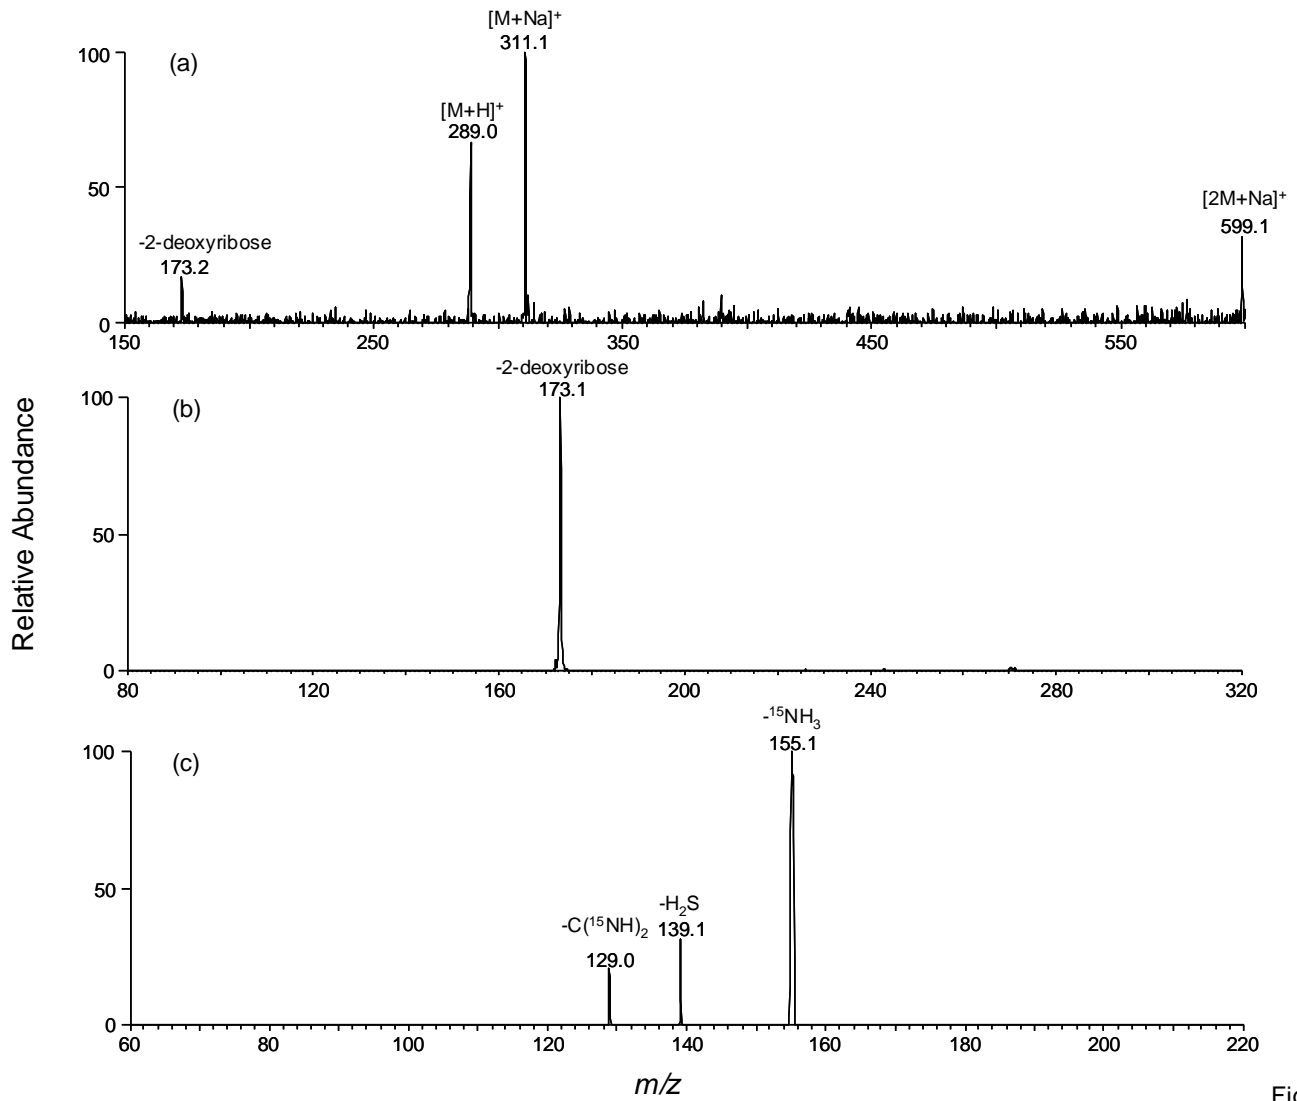

Figure S1

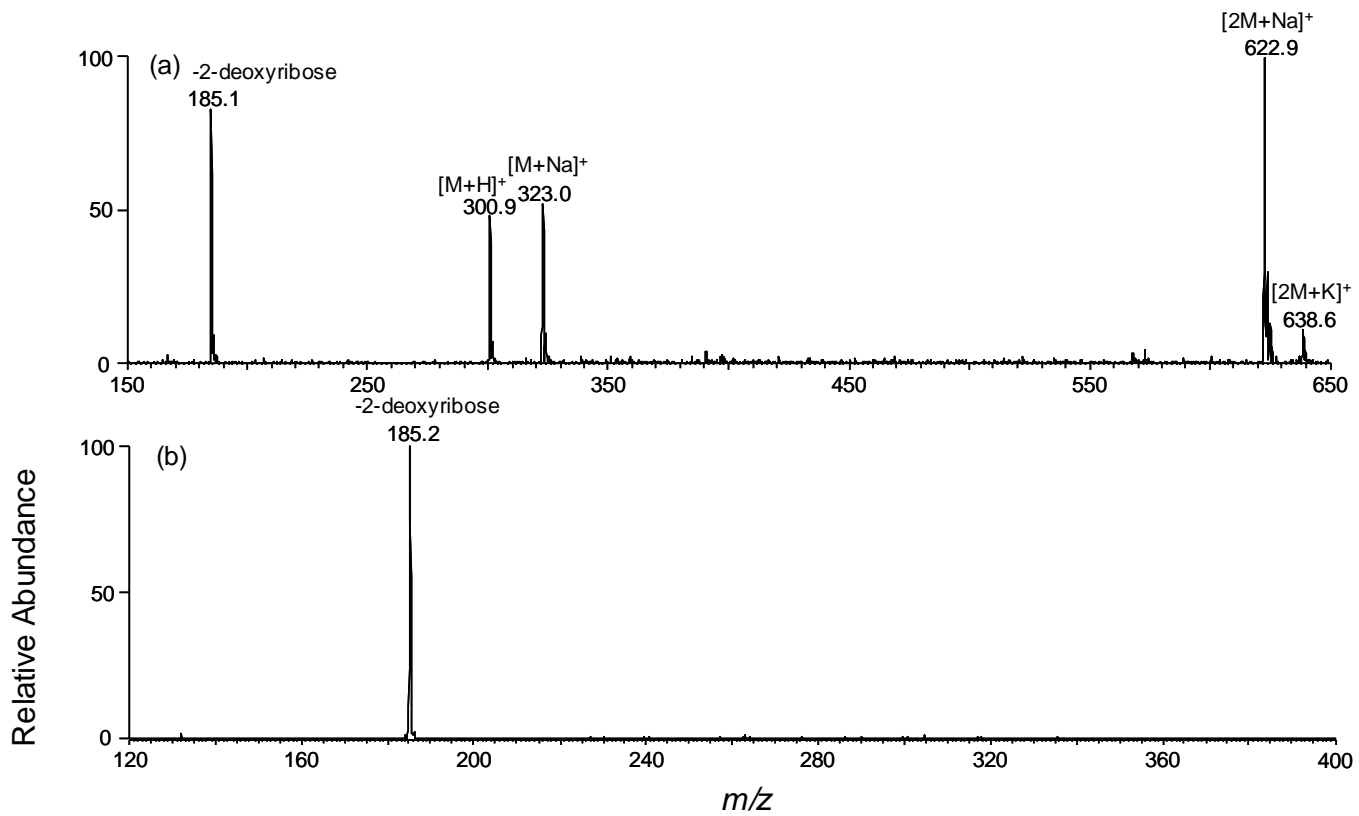

Figure S2

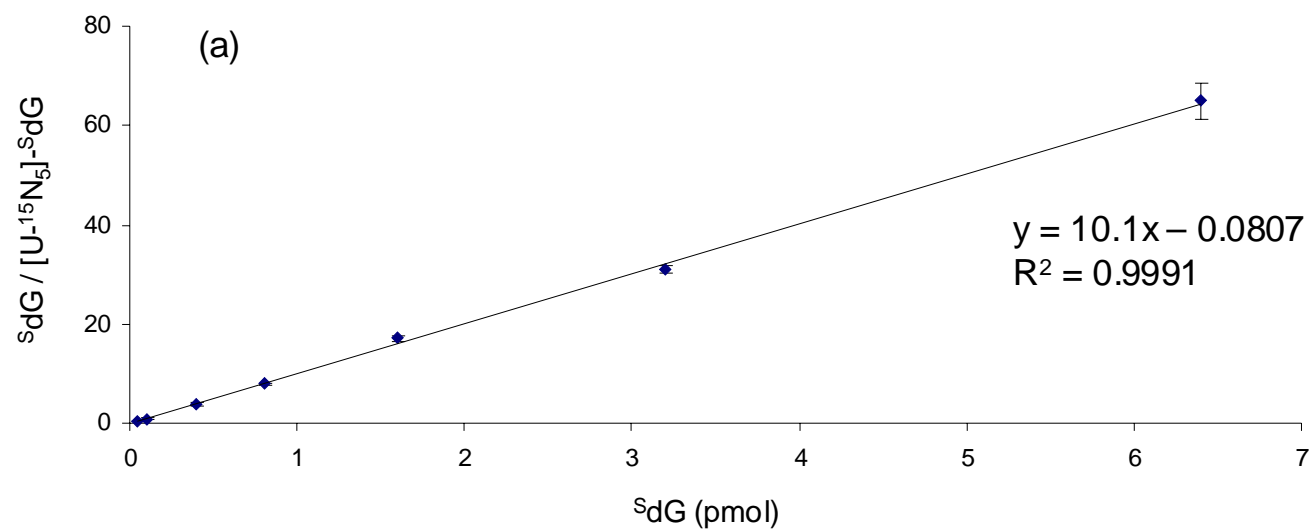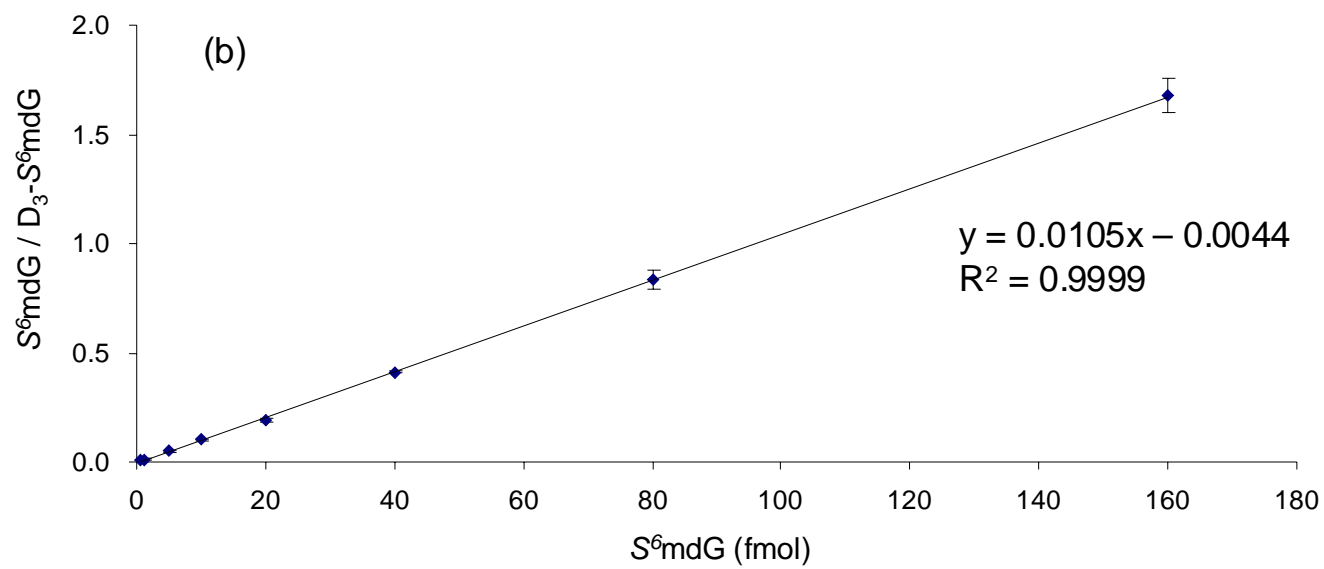

Figure S3

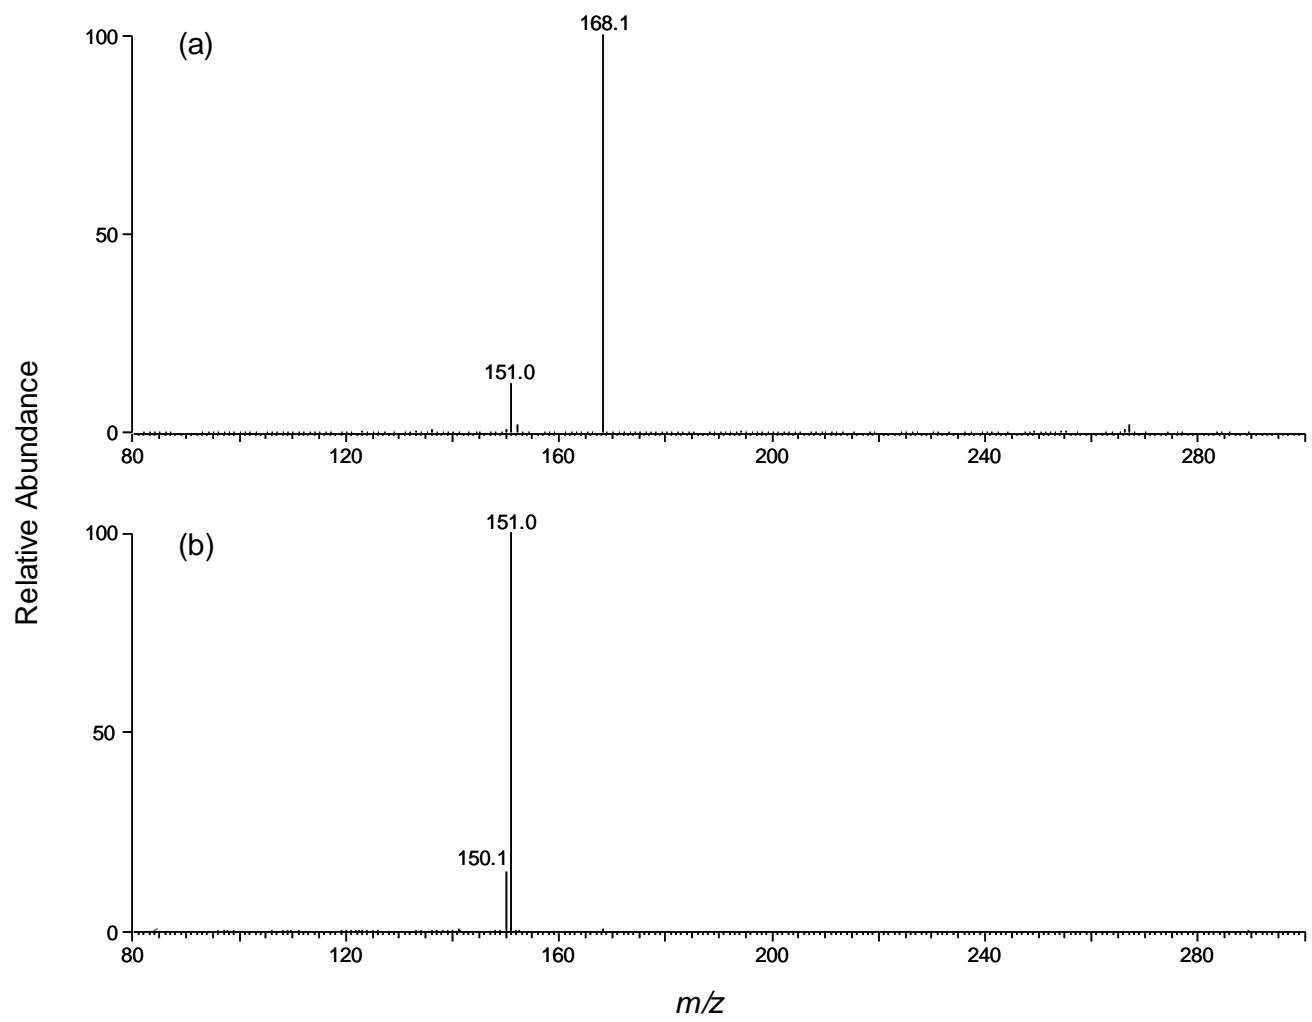

Figure S4
